# Supplementary material for: Facile synthesis of visible-light-driven Cu2O/BiVO4 composites for the photomineralization of recalcitrant pesticides
Source: Royal Society of Chemistry journal article supplement (doi:10.1039/c7ra08513c), 2017-01-01
Supplement: c7ra08513c1.pdf [file c7ra08513c1.pdf]

## **Facile synthesis of visible-light-driven Cu<sub>2</sub>O/BiVO<sub>4</sub> composites for the photomineralization of recalcitrant pesticides**

**E. Aguilera-Ruiz<sup>1</sup>, M. de la Garza-Galván<sup>1</sup>, P. Zambrano-Robledo<sup>1</sup>, J.C. Ballesteros-Pacheco<sup>2</sup>, J. Vazquez-Arenas<sup>3</sup>, J. Peral<sup>4</sup> and U.M. García-Pérez<sup>1</sup>**

<sup>1</sup>**Universidad Autónoma de Nuevo León, Facultad de Ingeniería Mecánica y Eléctrica, Centro de Investigación e Innovación en Ingeniería Aeronáutica, Carretera a Salinas Victoria Km 2.3, C.P. 66600, Apodaca, N.L., MEXICO.**

<sup>2</sup>**Universidad Politécnica de Lázaro Cárdenas, Departamento de Ingeniería Ambiental, Laboratorio de Sustentabilidad Energética, Av. Galeana S/N, Col. 600 Casas, C. P. 60950, Lázaro Cárdenas Mich., MEXICO.**

<sup>3</sup>**Centro Mexicano para la Producción más Limpia, Instituto Politécnico Nacional, Av. Acueducto s/n, Col. La Laguna Ticomán, Ciudad de México, 07340, MEXICO.**

<sup>4</sup>**Universitat Autònoma de Barcelona, Department de Química, 08193 Cerdanyola del Vallès, SPAIN.**

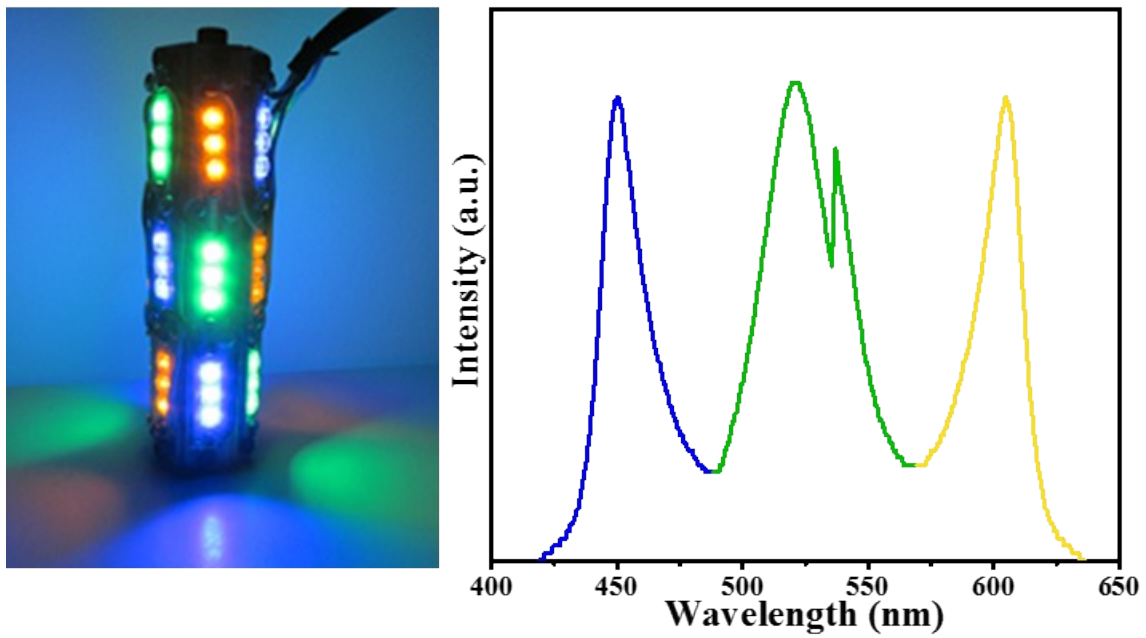

**Fig. S1.** LED lamp used for the photocatalytic experiments and emission spectrum of the LED source.

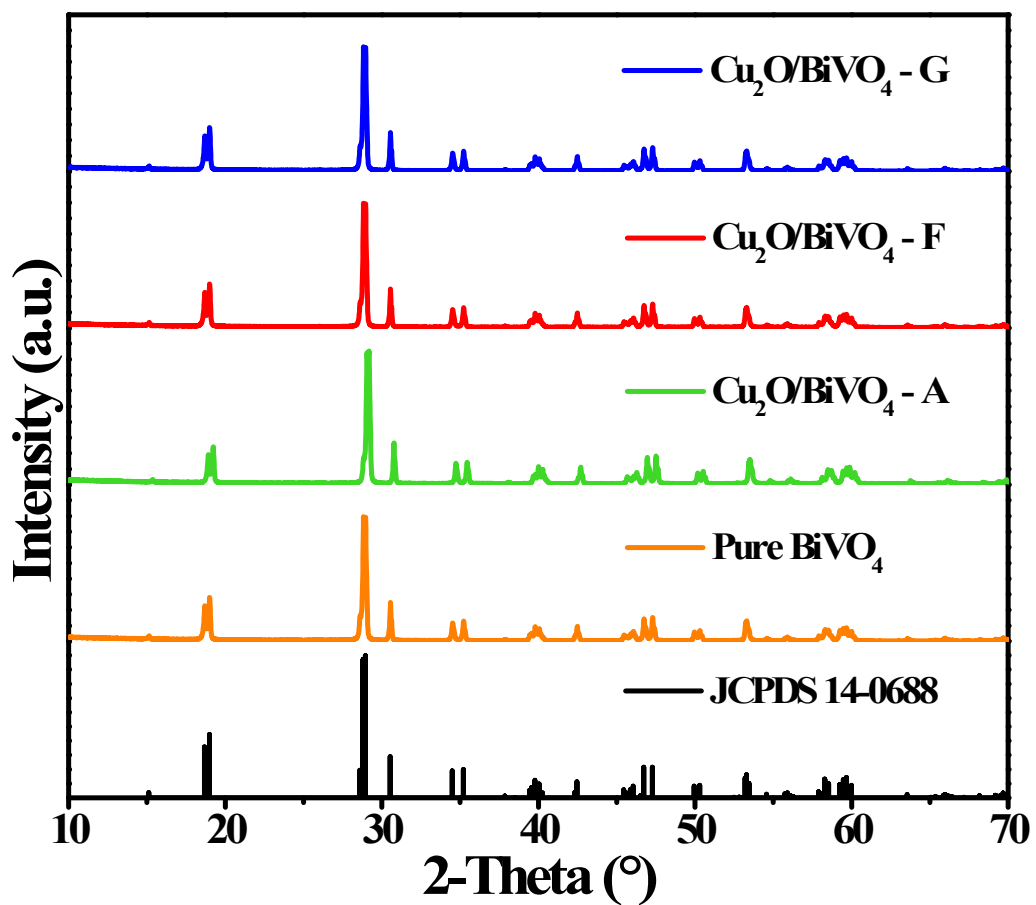

**Fig. S2.** XRD patterns of the Cu<sub>2</sub>O/BiVO<sub>4</sub> composites synthesized by an impregnation method.

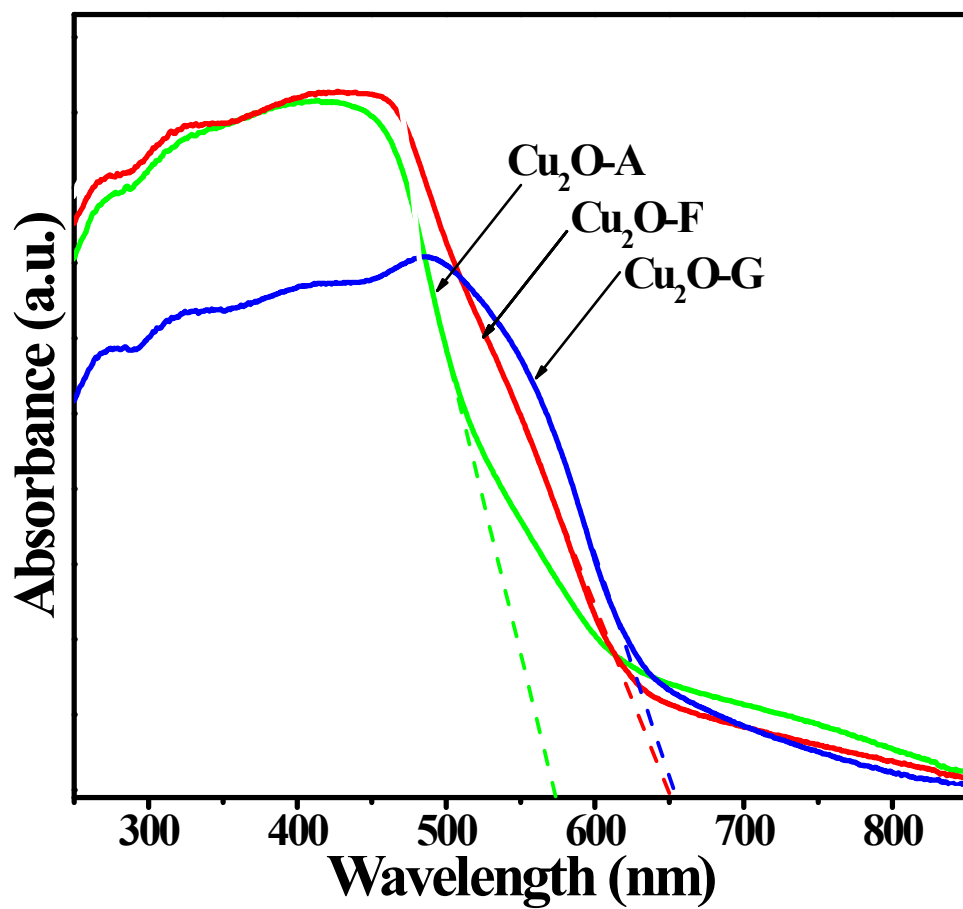

**Fig. S3.** DRS UV-Vis spectra of the as-synthesized Cu<sub>2</sub>O powders using different reducing reagents.

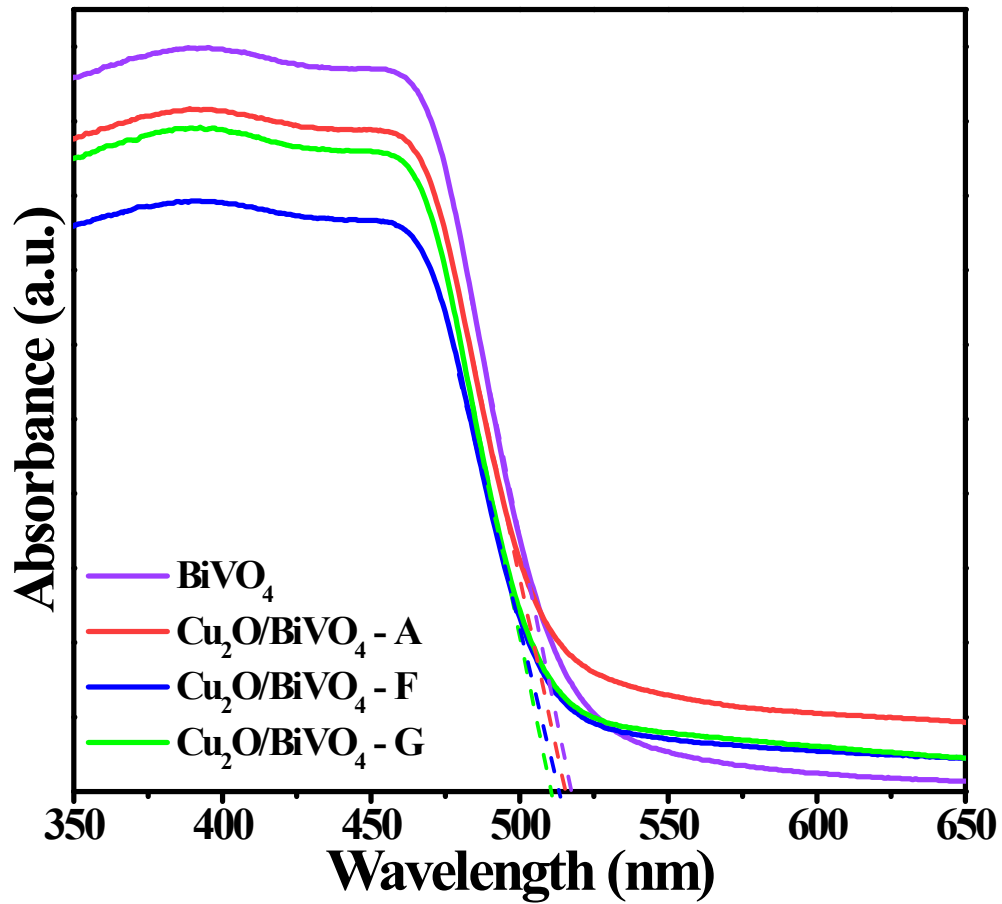

Fig. S4. DRS UV-Vis spectra of the of the Cu<sub>2</sub>O/BiVO<sub>4</sub> composites synthesized by an impregnation method.

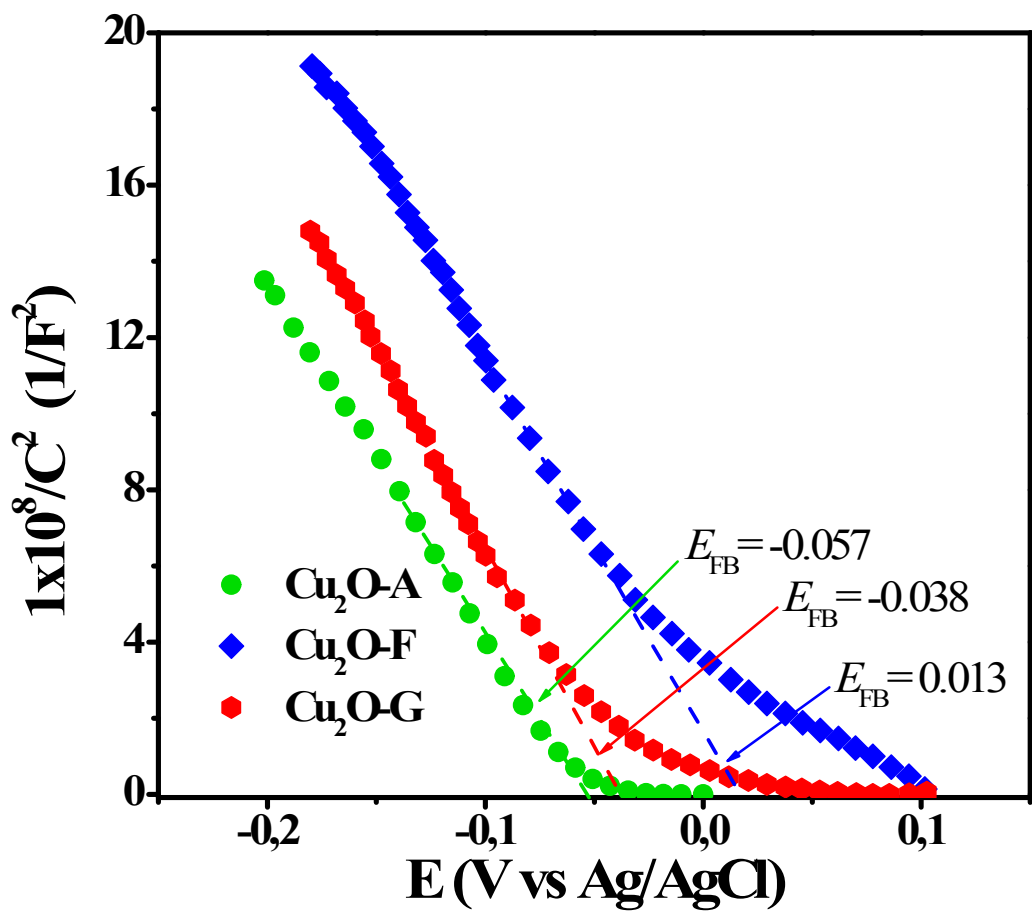

Fig. S5. Mott-Schottky plots of the pure as-synthesized  $\text{Cu}_2\text{O}$  samples.

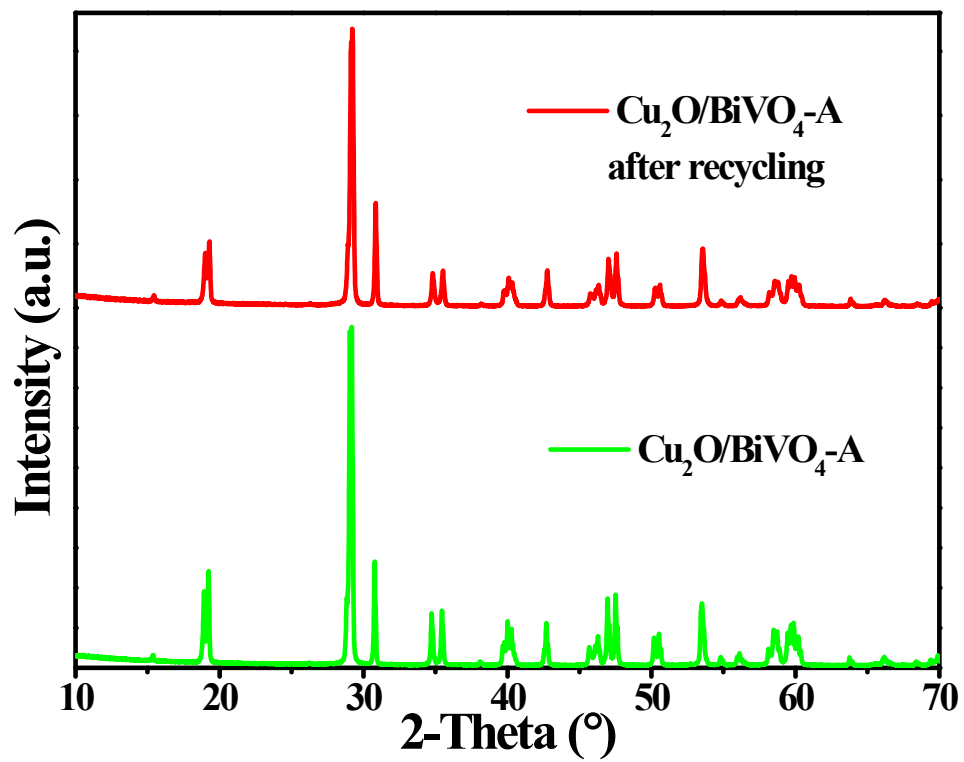

**Fig. S6.** XRD patterns of the  $\text{Cu}_2\text{O}/\text{BiVO}_4$  composites before and after three continuous cycles of photocatalytic tests.

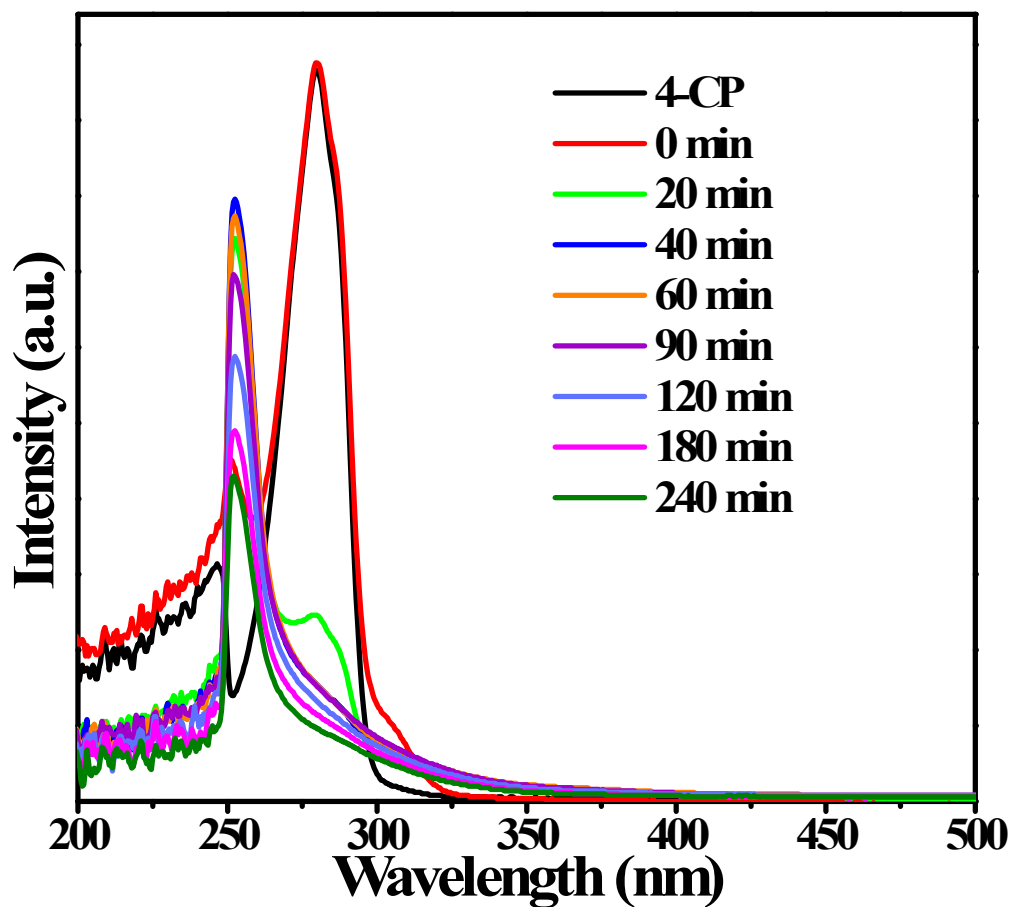

**Fig. S7.** Experimental UV-Vis spectra collected during the course of 4-CP degradation during 240 min.  $25 \text{ mg}\cdot\text{L}^{-1}$  of 4-CP initial concentration and  $5 \text{ g}\cdot\text{L}^{-1}$  of  $\text{Cu}_2\text{O}/\text{BiVO}_4\text{-A}$  as photocatalyst were used in the experiments. The system was initially maintained in the dark during 60 min ( $t = 0$ ).
